# Supplementary material for: Molecular characterization of S. japonicum exosome-like vesicles reveals their regulatory roles in parasite-host interactions
Source: PubMed Central journal article supplement (PMC4865838; doi:10.1038/srep25885), 2016-05-13
Supplement: srep25885-s1.pdf [file srep25885-s1.pdf]

## Supplementary information

### **Molecular characterization of *S. japonicum* exosome-like vesicles reveals their regulatory roles in parasite-host interactions**

Lihui Zhu<sup>1</sup>, Juntao Liu<sup>1</sup>, Jinwei Dao<sup>1</sup>, Ke Lu<sup>1</sup>, Hao Li<sup>1</sup>, Huiming Gu<sup>1</sup>, Jinming Liu<sup>1</sup>, Xingang Feng<sup>1</sup>, & Guofeng Cheng<sup>1\*</sup>

<sup>1</sup>Shanghai Veterinary Research Institute, Chinese Academy of Agricultural Sciences, Key Laboratory of Animal Parasitology, Ministry of Agriculture, 518 Ziyue Road, Shanghai, China.

\*To whom correspondence may be addressed:

Shanghai Veterinary Research Institute, Chinese Academy of Agricultural Sciences; Key Laboratory of Animal Parasitology, Ministry of Agriculture, 518 Ziyue Road, Shanghai, 200241, China.

Tel: 86-213-429-3659; Fax: 86-215-408-1818;

E-mail: cheng\_guofeng@yahoo.com or chenggfeng@shvri.ac.cn.

**Supplementary Table S1: The list of structural-associated proteins in *S. japonicum* EVs putatively identified by bioinformatics**

| Proteins                                               | Database ID no. |
|--------------------------------------------------------|-----------------|
| Microtubule-associated protein futsch                  | C1L4F7          |
| Microtubule-associated protein RP/EB family member 1   | C1L436          |
| Tubulin, alpha 1                                       | C1LE18          |
| Tubulin beta-2C chain                                  | C1LVE4          |
| Elongation factor 1-alpha                              | Q5DGS7          |
| Elongation FacTor                                      | C1LFJ1          |
| Eukaryotic translation elongation factor 1 alpha 2     | C1LBW3          |
| Eukaryotic translation elongation factor 1 gamma       | C1LV11          |
| Eukaryotic translation elongation factor 1 beta 2      | C1L985          |
| Putative ribosomal protein L5                          | C1LUC1          |
| 40S ribosomal protein SA                               | RSSA            |
| 40S ribosomal protein S12                              | Q5DE28          |
| Gelsolin                                               | C1L4M3          |
| Dynein light chain 1                                   | Q9XTK6          |
| Actin-related protein 2/3 complex subunit 3            | C1L5L1          |
| Putative Ezrin                                         | C7TXW6          |
| Dynamin 1-like protein                                 | C1LEY9          |
| Ubiquitin carboxyl-terminal hydrolase                  | C1LIT8          |
| Ubiquitin fusion degradation protein 1 homolog         | C1LJP2          |
| Ubiquitin C                                            | C1LYC1          |
| Actin related protein 2/3 complex, subunit 2           | C1L4E5          |
| Actin related protein 2/3 complex, subunit 4           | Q5DFU4          |
| CDC37 cell division cycle 37 homolog                   | Q5DGJ2          |
| Laminin, beta 1                                        | C1LED3          |
| Sorting nexin-6                                        | C1LD78          |
| Vacuolar protein sorting-associated protein 28 homolog | Q5DGV7          |
| Sorting nexin-18                                       | C1LG69          |

**Supplementary Table S2: The list of pathways analyses by KEGG**

| Pathways                                                          | Hits | Percent (%) | Genes                                            |
|-------------------------------------------------------------------|------|-------------|--------------------------------------------------|
| Integrin signalling pathway                                       | 8    | 4.20%       | ARPC2 TLN1 Pxn ARPC3 SNX6 Lamb1 CDC42 Pik3r1     |
| Ubiquitin proteasome pathway                                      | 8    | 4.20%       | PSMD12 PSMC4 PSMD4 PSMD6 PSMD7 PSMC3 PSMC2 PSMD2 |
| CCKR signaling map                                                | 8    | 4.20%       | Pxn MAP2K6 PRKG1 YWHAB CDC42 Pik3r1 PTPN11 ROCK1 |
| Huntington disease                                                | 7    | 3.70%       | DYNLL1 ARL4A GAPDH DYNC1I2 TUBB4B CAPN10 RpL12   |
| Cytoskeletal regulation by Rho GTPase                             | 7    | 3.70%       | ARPC2 ARPC3 ARPC4 TUBB4B CDC42 ROCK1 RpL12       |
| Gonadotropin releasing hormone receptor pathway                   | 7    | 3.70%       | Pxn MAP2K6 CDC42 Pik3r1 PRKAG2 ANXA5 TUBA1B      |
| Inflammation mediated by chemokine and cytokine signaling pathway | 5    | 2.60%       | ARPC2 ARPC3 ARPC4 CDC42 ROCK1                    |
| Parkinson disease                                                 | 5    | 2.60%       | CUL1 YWHAB PSMB4 CSNK2A1 TH                      |
| Glycolysis                                                        | 4    | 2.10%       | GAPDH ALDOA ENO1 GPI                             |
| Angiogenesis                                                      | 3    | 1.60%       | Pxn Pik3r1 PTPN11                                |
| Adenine and hypoxanthine salvage pathway                          | 3    | 1.60%       | HPRT1 PNP ADA                                    |
| FGF signaling pathway                                             | 3    | 1.60%       | MAP2K6 YWHAB PTPN11                              |
| Endothelin signaling pathway                                      | 3    | 1.60%       | PRKAR1A PRKG1 Pik3r1                             |
| Cell cycle                                                        | 3    | 1.60%       | PSMD12 PSMD4 PSMD7                               |
| Axon guidance mediated by netrin                                  | 2    | 1.00%       | CDC42 Pik3r1                                     |
| Pentose phosphate pathway                                         | 2    | 1.00%       | GPI TALDO1                                       |
| VEGF signaling pathway                                            | 2    | 1.00%       | Pik3r1 Pxn                                       |
| Ras Pathway                                                       | 2    | 1.00%       | MAP2K6 CDC42                                     |
| T cell activation                                                 | 2    | 1.00%       | CDC42 Pik3r1                                     |
| EGF receptor signaling pathway                                    | 2    | 1.00%       | MAP2K6 YWHAB                                     |
| p38 MAPK pathway                                                  | 2    | 1.00%       | MAP2K6 CDC42                                     |
| PDGF signaling pathway                                            | 2    | 1.00%       | ARHGAP12 Pik3r1                                  |
| Oxidative stress response                                         | 2    | 1.00%       | TXN MAP2K6                                       |

**Supplementary Table S3: The list of membrane- and tegument-associated proteins in *S. japonicum* EVs putatively identified by bioinformatics**

| Proteins                                                                                          | Database ID no. | Molecular functions            | Biological processes  |
|---------------------------------------------------------------------------------------------------|-----------------|--------------------------------|-----------------------|
| 6-phosphofructokinase                                                                             | C1LED7          |                                |                       |
| 22.6 kDa tegumental antigen                                                                       | O44372          |                                |                       |
| Actin 5C                                                                                          | Q5DF69          |                                |                       |
| Actin related protein 2/3 complex, subunit 2                                                      | C1L4E5          | Structural molecule activity   |                       |
| Actin related protein 2/3 complex, subunit 4                                                      | Q5DFU4          | Structural molecule activity   |                       |
| Actin-like protein 3                                                                              | C1LJL2          | Structural molecule activity   |                       |
| Actin-related protein 2/3 complex subunit 3                                                       | C1L5L1          | Structural molecule activity   |                       |
| Alpha-centractin (Centractin) (Centrosome-associated actin homolog) (Actin-RPV) (ARP1) (Fragment) | C7TQQ1          |                                |                       |
| Ago2                                                                                              | M4QLF4          | Catalytic activity             |                       |
| Calcium-binding EF-hand, domain-containing protein                                                | Q5BQX8          | Calcium binding                | Calcium ion transport |
| Calcium-binding EF-hand, domain-containing protein                                                | C1LEK4          | Calcium binding                | Calcium ion transport |
| CD63 antigen                                                                                      | F6LHR8          | Calcium binding                | Calcium ion transport |
| Dynactin subunit 2                                                                                | C1LHQ2          |                                |                       |
| Dynactin subunit 4                                                                                | C1LGU5          |                                |                       |
| Dynein light chain                                                                                | C1L712          |                                |                       |
| Dynein light chain                                                                                | Q9XTL4          |                                |                       |
| Dynein light chain                                                                                | Q86H14          |                                |                       |
| Dynein light chain 1                                                                              | Q9XTK6          | Enzyme regulator activity      |                       |
| Elongation FacTor                                                                                 | C1LFJ1          | Structural molecule activity   |                       |
| Elongation factor 1-alpha                                                                         | Q5DGS7          | Nucleotide-binding             | Protein biosynthesis  |
| Eukaryotic translation elongation factor 1 alpha 2                                                | C1LBW3          | Translation regulator activity |                       |
| Eukaryotic translation elongation factor 1 beta 2                                                 | C1L985          | Translation regulator activity |                       |
| Eukaryotic translation elongation factor 1 gamma                                                  | C1LV11          | Translation regulator activity |                       |
| Fatty acid binding protein 7, brain                                                               | C1L9V6          | Lipid binding                  |                       |
| Fructose-bisphosphate aldolase                                                                    | Q1HDV2          |                                |                       |
| Glutathione S-Transferase                                                                         | Q26513          |                                | Detoxification        |
| Glyceraldehyde-3-phosphate dehydrogenase                                                          | C7TRL1          | Catalytic activity             | Glycolysis            |
| Heat shock protein 60 (Fragment)                                                                  | C7TZI6          |                                | Stress response       |
| Major egg antigen (P40)                                                                           | C1LU54          |                                |                       |
| MF3 protein (Fragment)                                                                            | Q8T5U1          |                                |                       |
| Mitochondrial import receptor subunit TOM34                                                       | C1LQQ3          |                                |                       |
| Phosphoglycerate mutase                                                                           | C1LNQ1          |                                | Glycolysis            |
| Phosphorylase                                                                                     | C1L566          |                                | Carbohydrate          |

|                                                |        |                              |                              |
|------------------------------------------------|--------|------------------------------|------------------------------|
|                                                |        |                              | metabolism                   |
| Putative actin-interacting protein 1           | C1LJU4 |                              |                              |
| Putative dynein light chain                    | Q5BS76 |                              |                              |
| Putative dynein light chain                    | Q5BQQ3 |                              |                              |
| Pyruvate kinase                                | Q5DAM7 |                              |                              |
| Tegument antigen (I(H)A)                       | C1L468 |                              |                              |
| Tropomyosin-2                                  | C7TXT8 |                              | Muscle contraction           |
| Tubulin beta-2C chain                          | C1LVE4 | Structural molecule activity | Microtubule-based process    |
| Heat shock protein 90                          | Q5D947 |                              | Stress response              |
| Putative ribosomal protein L5                  | C1LUC1 | Structural molecule activity |                              |
| 40S ribosomal protein SA                       | Q5DA90 | Structural molecule activity |                              |
| 40S ribosomal protein S12                      | Q5DE28 | Structural molecule activity |                              |
| T-complex protein 1 subunit delta              | C1LI13 |                              |                              |
| T-complex protein 1 subunit alpha              | Q5DF55 |                              |                              |
| T-complex protein 1 subunit gamma              | C1LHD3 |                              |                              |
| Ubiquitin C                                    | C1LYC1 | Protein binding              | Protein modification process |
| Ubiquitin carboxyl-terminal hydrolase          | C1LIT8 | Protein binding              | Protein modification process |
| Ubiquitin fusion degradation protein 1 homolog | C1LJP2 | Protein binding              | Protein modification process |

**Supplementary Table S4: The List of identified miRNAs associated with *S. japonicum* EVs homologous to miRNAs deposited in ExoCarta**

| Small RNA IDs | Sequences              | miRNAs         | miRNAs deposited in Exocarta | E-value <sup>§</sup> |
|---------------|------------------------|----------------|------------------------------|----------------------|
| t0000001      | AACCCTGTAGACCCGAGTTTGG | sja-miR-10-5p  | hsa-miR-10a-5p               | 0.13                 |
| t0000305      | CGTCTCAAAGGACTGTGAGCC  | sja-miR-2b-5p  | hsa-miR-28-5p                | 2.2                  |
| t0000902      | GGAGGTAGTTCGTTGTGTGGT  | sja-let-7      | hsa-let-7b-5p                | 0.12                 |
| T000027       | CAACGGAATCCCAAAGCAGCTG | Ocu-miR-191-5p | hsa-miR-191-5p               | 2e-04                |

<sup>§</sup>The miRNA sequences in *S. japonicum* were analyzed with homologous to *Homo sapiens* miRNAs deposited in Exocarta database by BLASTN program. Blast E value was calculated.
